# Supplementary material for: Effect of alpha-linolenic acid on aminoglycoside nephrotoxicity and RhoA/Rho-kinase pathway in kidney
Source: PeerJ. 2024 Oct 18;12:e18335. doi: 10.7717/peerj.18335 (PMC11493068; doi:10.7717/peerj.18335)
Supplement: Supplemental Information 2 [file peerj-12-18335-s002.xlsx]

## Sheet: RhoA (Figure 1)
Control (pg/ml)	Gentamicin (pg/ml)	Gentamicin+ALA (pg/ml)
1097.97	1665.94	1065.97
911.04	1561.11	1034.43
1048.02	1779.09	1083.77
1845.05	2205.73	1310
904.31	1644.93	1005.11
863.94	1068.95	861.26
2115.54	2213.74	1472.36
1292.93	1900.72	1115.1

## Sheet: rho-kinase II (Figure 2)
Control (pg/ml)	Gentamicin (pg/ml)	Gentamicin+ALA (pg/ml)
32548.8	45575.7	39996.1
28266.3	44430.8	35640
42726.5	50672	42047.1
32575.1	49632.7	41529.4
23767.9	43577.6	36885.3
35544.4	50549.4	41999.4
31287.7	46992.1	41235.7
31399.9	46313.4	39129.1

## Sheet: rho-kinase activity (Figure 3)
Control (p-MYPT pg/mg)	Gentamicin (p-MYPT pg/mg)	Gentamicin+ALA (p-MYPT pg/mg)
9.86	16.13	13.87
8.11	11.88	10.25
9.19	14.28	11.62
7.55	10.6	6.98
7.83	11.85	8.73
8.66	13.05	10.83
9.22	15.62	12.13
8.19	13.91	11.28
